# Supplementary material for: Food intolerances in children and adolescents in Switzerland
Source: PubMed Central journal article supplement (PMC9899185; doi:10.1007/s00431-022-04755-7), 2022-12-13
Supplement: 431_2022_4755_MOESM3_ESM.pdf [file 431_2022_4755_MOESM3_ESM.pdf]

## Food intolerances in children and adolescents

### Participants' questionnaire

With this survey, we would like to assess the frequency of food intolerances among children and adolescents in Northwestern Switzerland. All data will be treated confidentially and are used anonymously. Participation is voluntary and consent can be withdrawn any time. We recommend that children under 12 years of age complete the questionnaire together with a parent.

I agree that the data provided may be used anonymously for research purposes.

If you do not want to participate, you can specify the reason here:

- Language comprehension problems
- My child has no food intolerances.
- Other: .....

This questionnaire was filled out:

- At the Children's Hospital Aarau
- At the UKBB
- In a pediatric practice

The questionnaire was filled out by:  Mother  Father  Child with a parent  
 Child or teenager alone

1. Age of the child in years: .....

2. Sex of the child: M  F

3. Place of birth of the child: .....

3.1. Place of birth of the mother: .....

3.2. Place of birth of the father: .....

4. Current place of residence of the child/adolescent:

- City (Aarau, Baden, Basel-Stadt, Olten, Liestal)
- Rather urban (locality > 10'000 inhabitants)
- Rather rural
- Village

5. Does your child have an underlying disease? NO   Yes, the following: .....

6. Does your child have allergies, which have been diagnosed by a family doctor, a paediatrician or an allergologist and require treatment?

No  Yes, the following:

.....

7. What is your highest completed education?

Mother    Father

- |                          |                          |                                                       |
|--------------------------|--------------------------|-------------------------------------------------------|
| <input type="checkbox"/> | <input type="checkbox"/> | Less than 7 years of school                           |
| <input type="checkbox"/> | <input type="checkbox"/> | Mandatory school                                      |
| <input type="checkbox"/> | <input type="checkbox"/> | Apprenticeship                                        |
| <input type="checkbox"/> | <input type="checkbox"/> | Vocational apprenticeship, vocational school          |
| <input type="checkbox"/> | <input type="checkbox"/> | High school, vocational baccalaureate, diploma school |
| <input type="checkbox"/> | <input type="checkbox"/> | Higher technical and professional education           |
| <input type="checkbox"/> | <input type="checkbox"/> | University, technical college                         |
| <input type="checkbox"/> | <input type="checkbox"/> | Not determinable, unknown                             |

*The following questions apply to **your child** or to **you (child or adolescent)**.*

8. Does your child/do you have a food intolerance, or are there food groups that are not good for your child/you:  Yes  No

➤ If yes, what foods/food ingredients are you trying to avoid with your child/are you trying to avoid?

- |                                           |                                                 |                                                    |
|-------------------------------------------|-------------------------------------------------|----------------------------------------------------|
| <input type="checkbox"/> Lactose          | <input type="checkbox"/> Fructose (fruit sugar) | <input type="checkbox"/> Sucrose (household sugar) |
| <input type="checkbox"/> Sorbitol         | <input type="checkbox"/> Histamine              | <input type="checkbox"/> Gluten                    |
| <input type="checkbox"/> Fish and seafood | <input type="checkbox"/> Meat                   | <input type="checkbox"/> Wheat                     |
| <input type="checkbox"/> Others: .....    | <input type="checkbox"/> Eggs                   | <input type="checkbox"/> Nuts                      |

➤ Who suggested that your child/you has/have these food intolerances?

- |                                                   |                                                      |                                              |
|---------------------------------------------------|------------------------------------------------------|----------------------------------------------|
| <input type="checkbox"/> Own/parental observation | <input type="checkbox"/> Gastrointestinal specialist | <input type="checkbox"/> Hospital doctor     |
| <input type="checkbox"/> Pediatrician             | <input type="checkbox"/> Kinesiologist               | <input type="checkbox"/> Parents counselling |
| <input type="checkbox"/> Naturopath               | <input type="checkbox"/> Friends                     | <input type="checkbox"/> Internet research   |
| <input type="checkbox"/> Relatives                | <input type="checkbox"/> Others: .....               |                                              |

➤ Have medical examinations been made?

- |                                                  |                                        |                                            |                                          |
|--------------------------------------------------|----------------------------------------|--------------------------------------------|------------------------------------------|
| <input type="checkbox"/> No                      | <input type="checkbox"/> Blood test    | <input type="checkbox"/> Stool examination | <input type="checkbox"/> Breath test     |
| <input type="checkbox"/> Gastroscopy/colonoscopy | <input type="checkbox"/> Skin test     | <input type="checkbox"/> Genetic test      | <input type="checkbox"/> Removal attempt |
| <input type="checkbox"/> Food diary              | <input type="checkbox"/> Others: ..... |                                            |                                          |

➤ What symptoms occur when your child/you consume the food(s) in question?

- Abdominal pain       Nausea       Diarrhea       Headache
- Flatulence       Skin problems       Tiredness       Bloating
- Concentration difficulties       Vomiting       Performance reduction
- Others: .....

In case of multiple intolerances, please specify which food the complaints refer to:

.....

9. Are there foods (e.g., gluten, wheat) that you are trying to reduce for health reasons, even if your child/you doesn't/don't get symptoms from them?

- No       Yes, the following: .....
